# Supplementary material for: Artificial Intelligence-Aided Mapping of the Structure–Composition–Conductivity Relationships of Glass–Ceramic Lithium Thiophosphate Electrolytes
Source: PubMed Central journal article supplement (PMC9367015; doi:10.1021/acs.chemmater.2c00267), 2022-07-20
Supplement: cm2c00267_si_001.pdf [file cm2c00267_si_001.pdf]

## Supporting Information

### Artificial Intelligence-Aided Mapping of the Structure-Composition-Conductivity Relationships of Glass-Ceramic Lithium Thiophosphate Electrolytes

*Haoyue Guo<sup>a</sup>, Qian Wang<sup>a</sup>, Alexander Urban<sup>† a,b,c</sup>, and Nongnuch Artrith<sup>\* a,b,d</sup>*

<sup>a</sup>Department of Chemical Engineering, Columbia University, New York, NY 10027, USA

<sup>b</sup>Columbia Center for Computational Electrochemistry, Columbia University, New York, NY 10027, USA

<sup>c</sup>Columbia Electrochemical Energy Center, Columbia University, New York, NY 10027, USA

<sup>d</sup>Materials Chemistry and Catalysis, Debye Institute for Nanomaterials Science, Utrecht University, 3584 CG Utrecht, The Netherlands

†E-mail: [a.urban@columbia.edu](mailto:a.urban@columbia.edu) \*E-mail: [n.artrith@uu.nl](mailto:n.artrith@uu.nl)

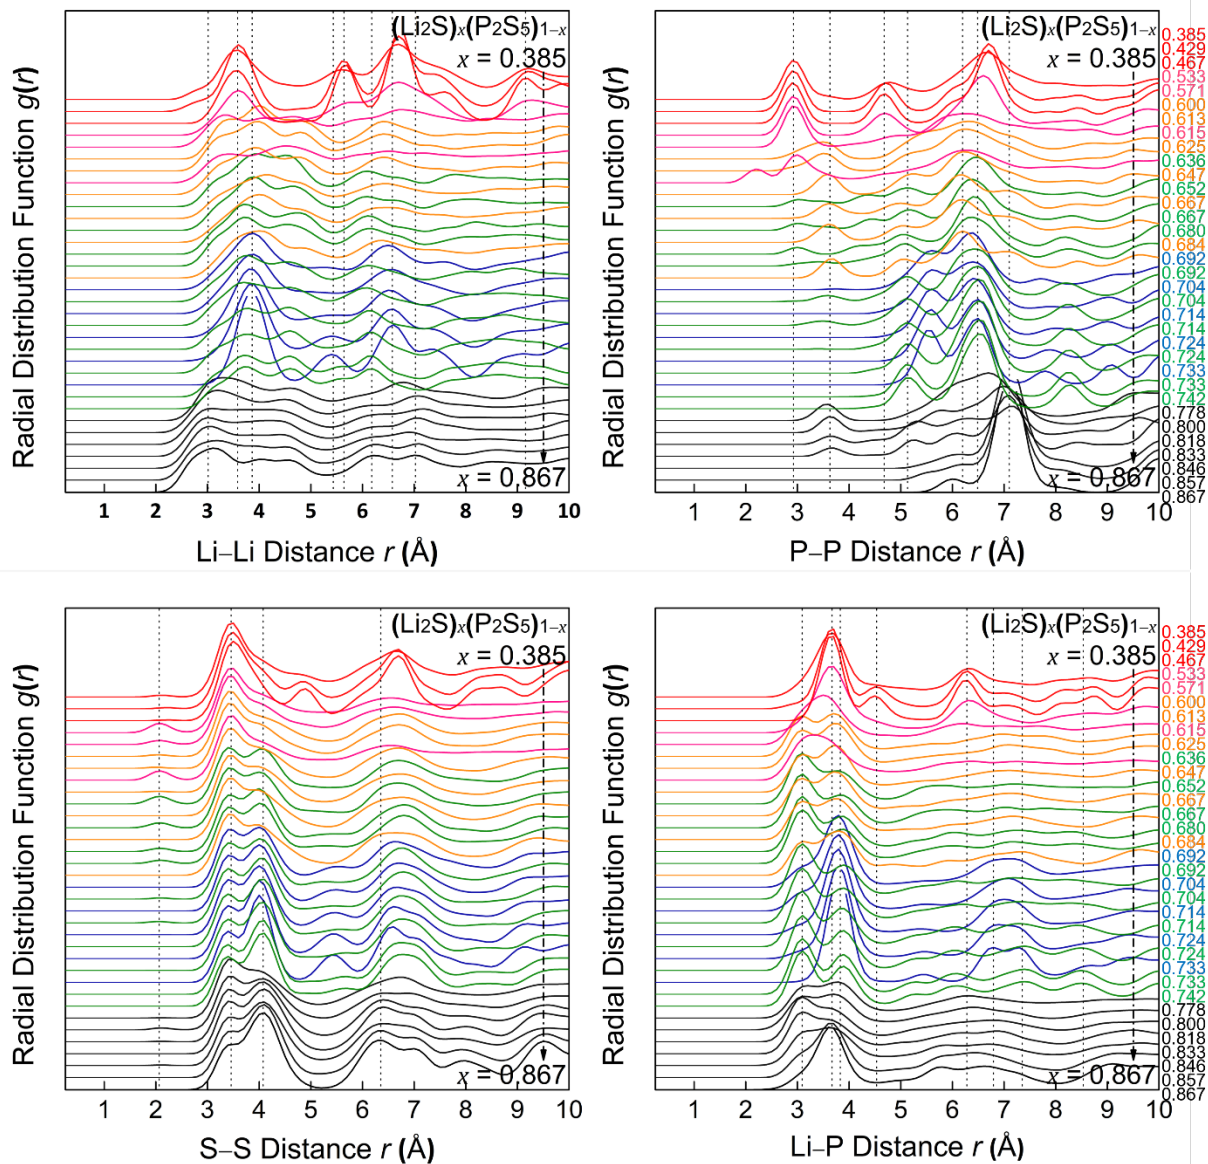

**Figure S1.** Calculated Li-Li, P-P, S-S and Li-P radial distribution functions (RDF) of glass-ceramic (*gc*)  $(\text{Li}_2\text{S})_x(\text{P}_2\text{S}_5)_{1-x}$  (*gc*-LPS) phases with changing compositions from  $x = 0.867$  to  $x = 0.385$ . Each line is an average RDF of ten lowest energy structures at certain composition. Since the *gc*-LPS structures are generated with genetic-algorithm (details in Methods Section), the color represents their parent crystalline structure (*i.e.*, black:  $\text{Li}_7\text{PS}_6$ , blue:  $\gamma\text{-Li}_3\text{PS}_4$ , green:  $\beta\text{-Li}_3\text{PS}_4$ , orange:  $\text{Li}_7\text{P}_3\text{S}_{11}$ , pink and red:  $\text{LiPS}_3$ ). The dashed lines represent measured RDF for crystalline phases.<sup>1-8</sup>

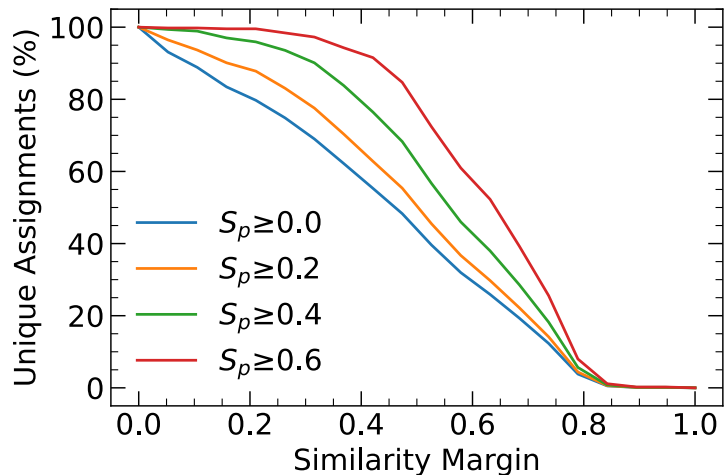

**Figure S2.** Percentage of  $(\text{Li}_2\text{S})_x(\text{P}_2\text{S}_5)_{1-x}$  structures that can be uniquely assigned to a reference crystal structure based on their Pearson similarity value  $S_p$ . The y axis, the *Similarity Margin*, is the similarity difference to the second most similar reference structure. Data for four different similarity thresholds are shown. In the present work, we considered only structures that have a similarity of  $S_p \geq 0.4$  with any of the reference structures (green curve). With this choice, more than 95% of the structures can be assigned uniquely to a reference structure subject to a similarity margin of 0.2.

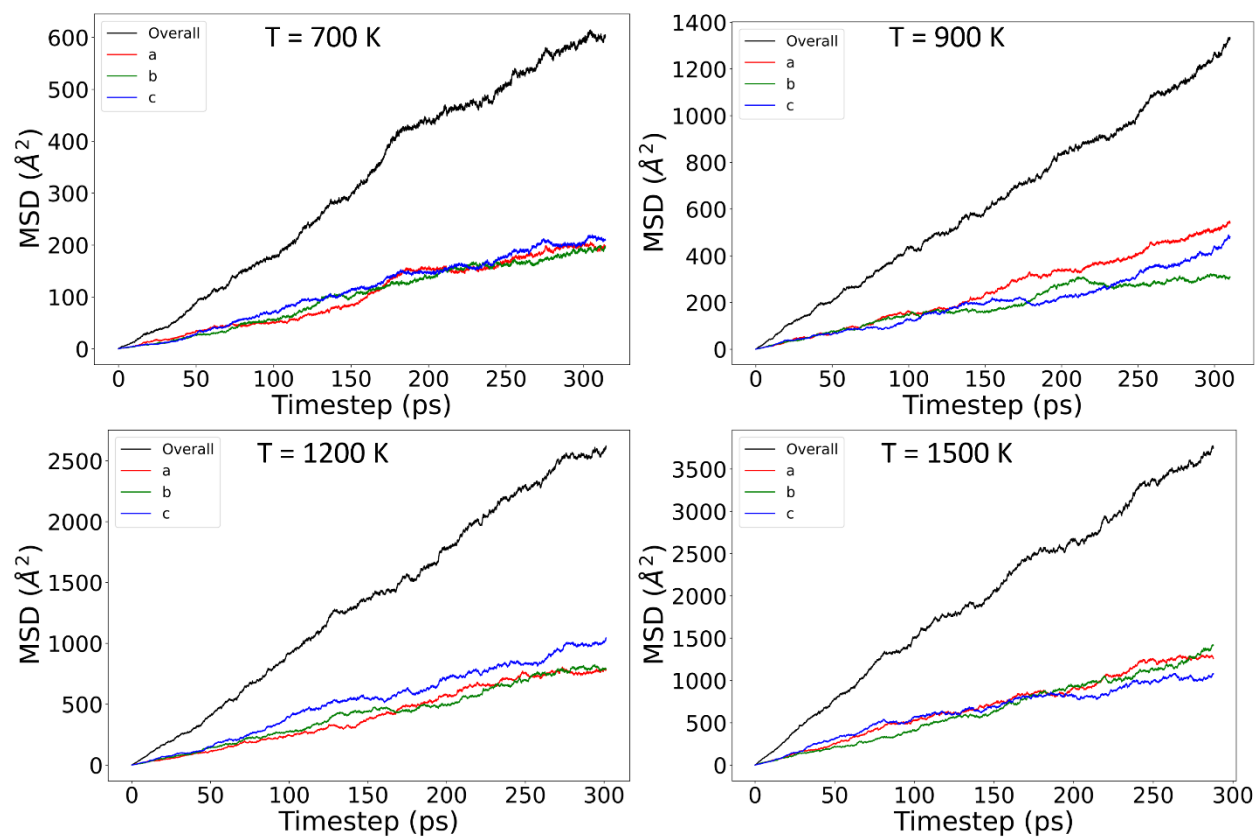

**Figure S3.** The mean-squared-displacement (MSD) of Li ions in  $gc\text{-Li}_{42}\text{P}_{16}\text{S}_{61}$  at elevated temperatures (700 K, 900 K, 1200 K and 1500 K).

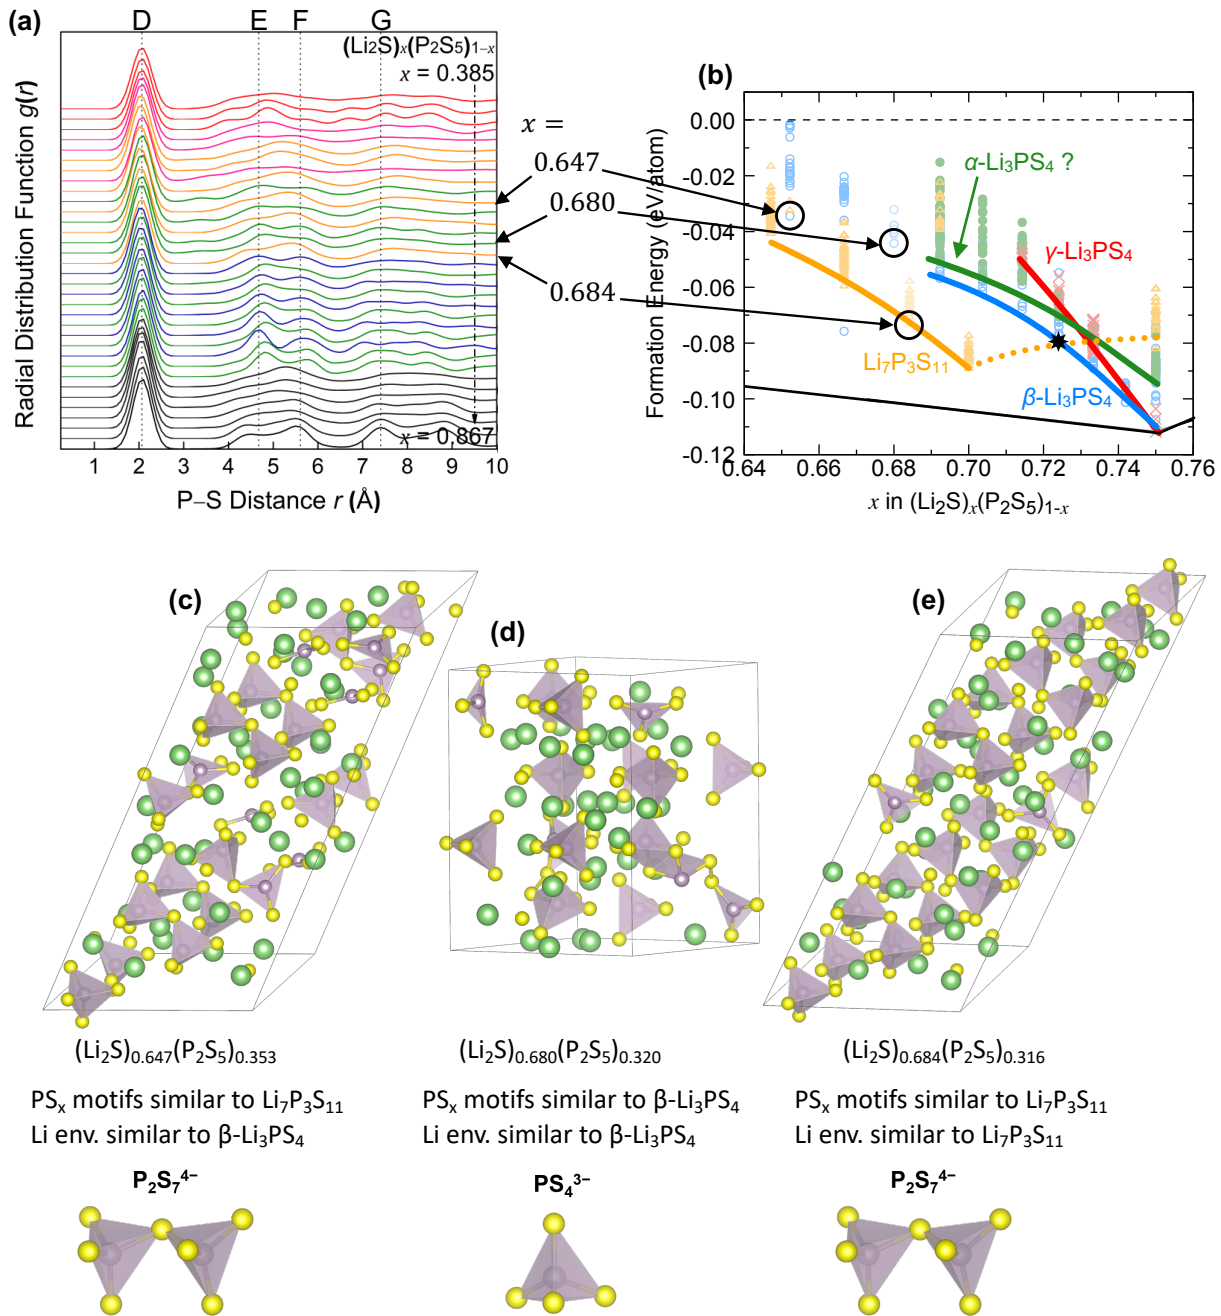

**Figure S4.** (a) P-S radial distribution functions (RDFs), (b) cluster analysis of Li site environments, (c)-(d) visualization and analysis of exemplary sampled structures. As also established in prior work, the P-S RDF shown in panel (a) correlates with the  $\text{PS}_x$  motifs present in a structure. The cluster analysis of panel (b) allows the comparison of Li site environments. In the sampled structures, the Li environment is not necessarily defined by the  $\text{PS}_x$  motifs. One example is the  $(\text{Li}_2\text{S})_{0.647}(\text{P}_2\text{S}_5)_{0.353}$  structure shown in panel (c), which exhibits  $\text{P}_2\text{S}_7^{4-}$  motifs as its parent crystal structure  $\text{Li}_7\text{P}_3\text{S}_{11}$ , whereas the Li environments are more similar to those in the  $\beta\text{-Li}_3\text{PS}_4$  crystal structure. In the other two examples shown in panels (d) and (e), the  $\text{PS}_x$  motifs and the Li environment are inherited from the parent structure.

## REFERENCES

- (1) Onodera, Y.; Mori, K.; Otomo, T.; Sugiyama, M.; Fukunaga, T. Structural Evidence for High Ionic Conductivity of Li<sub>7</sub>P<sub>3</sub>S<sub>11</sub> Metastable Crystal. *J. Phys. Soc. Jpn.* **2012**, *81* (4), 044802. <https://doi.org/10.1143/JPSJ.81.044802>.
- (2) Ohara, K.; Mitsui, A.; Mori, M.; Onodera, Y.; Shiotani, S.; Koyama, Y.; Orikasa, Y.; Murakami, M.; Shimoda, K.; Mori, K.; Fukunaga, T.; Arai, H.; Uchimoto, Y.; Ogumi, Z. Structural and Electronic Features of Binary Li<sub>2</sub>S-P<sub>2</sub>S<sub>5</sub> Glasses. *Sci. Rep.* **2016**, *6* (1), 21302. <https://doi.org/10.1038/srep21302>.
- (3) Dietrich, C.; Sadowski, M.; Sicolo, S.; Weber, D. A.; Sedlmaier, S. J.; Weldert, K. S.; Indris, S.; Albe, K.; Janek, J.; Zeier, W. G. Local Structural Investigations, Defect Formation, and Ionic Conductivity of the Lithium Ionic Conductor Li<sub>4</sub>P<sub>2</sub>S<sub>6</sub>. *Chem. Mater.* **2016**, *28* (23), 8764–8773. <https://doi.org/10.1021/acs.chemmater.6b04175>.
- (4) Dietrich, C.; Weber, D. A.; Culver, S.; Senyshyn, A.; Sedlmaier, S. J.; Indris, S.; Janek, J.; Zeier, W. G. Synthesis, Structural Characterization, and Lithium Ion Conductivity of the Lithium Thiophosphate Li<sub>2</sub>P<sub>2</sub>S<sub>6</sub>. *Inorg. Chem.* **2017**, *56* (11), 6681–6687. <https://doi.org/10.1021/acs.inorgchem.7b00751>.
- (5) Dietrich, C.; Weber, D. A.; Sedlmaier, S. J.; Indris, S.; Culver, S. P.; Walter, D.; Janek, J.; Zeier, W. G. Lithium Ion Conductivity in Li<sub>2</sub>S–P<sub>2</sub>S<sub>5</sub> Glasses – Building Units and Local Structure Evolution During the Crystallization of Superionic Conductors Li<sub>3</sub>PS<sub>4</sub>, Li<sub>7</sub>P<sub>3</sub>S<sub>11</sub> and Li<sub>4</sub>P<sub>2</sub>S<sub>6</sub>. *J. Mater. Chem. A* **2017**, *5* (34), 18111–18119. <https://doi.org/10.1039/C7TA06067J>.
- (6) Smith, J. G.; Siegel, D. J. Low-Temperature Paddlewheel Effect in Glassy Solid Electrolytes. *Nat. Commun.* **2020**, *11* (1), 1483. <https://doi.org/10.1038/s41467-020-15245-5>.
- (7) Garcia-Mendez, R.; Smith, J. G.; Neufeind, J. C.; Siegel, D. J.; Sakamoto, J. Correlating Macro and Atomic Structure with Elastic Properties and Ionic Transport of Glassy Li<sub>2</sub>S-P<sub>2</sub>S<sub>5</sub> (LPS) Solid Electrolyte for Solid-State Li Metal Batteries. *Adv. Energy Mater.* **2020**, *10* (19), 2000335. <https://doi.org/10.1002/aenm.202000335>.
- (8) Self, E. C.; Chien, P.-H.; O'Donnell, L. F.; Morales, D.; Liu, J.; Brahmabhatt, T.; Greenbaum, S.; Nanda, J. Investigation of Glass-Ceramic Lithium Thiophosphate Solid Electrolytes Using NMR and Neutron Scattering. *Mater. Today Phys.* **2021**, 100478. <https://doi.org/10.1016/j.mtphys.2021.100478>.
